1 Modern human alleles differentially regulate gene  
2 expression in brain tissues: implications for brain  
3 evolution

4 Alejandro Andirkó<sup>1,2</sup> and Cedric Boeckx<sup>1,2,3,\*</sup>

5 <sup>1</sup>University of Barcelona

6 <sup>2</sup>University of Barcelona Institute of Complex Systems

7 <sup>3</sup>ICREA

8 \*Corresponding author: [cedric.boeckx@ub.edu](mailto:cedric.boeckx@ub.edu)

9 **Abstract**

10 The availability of high-coverage genomes of our extinct relatives, the  
11 Neanderthals and Denisovans, and the emergence of large, tissue-specific  
12 databases of modern human genetic variation, offer the possibility of prob-  
13 ing the evolutionary trajectory of heterogenous structures of great inter-  
14 est, such as the brain. Here we cross two publicly available datasets,  
15 the GTEX cis-eQTL database (version 8) and an extended catalog of  
16 *Homo sapiens* specific alleles relative to the Neanderthal and Denisovan  
17 sequences to understand how nearly fixed *Sapiens*-derived alleles affect  
18 the regulation of gene expression across 15 structures. The list of variants  
19 obtained reveals enrichments in regions of the modern human genome  
20 showing putative signals of positive selection relative to archaic humans,  
21 points to associations with clinical conditions, and places the focus on spe-  
22 cific structures such as the cerebellum and the Hypothalamus-Pituitary-  
23 Adrenal Gland axis. The directionality of regulation of these variants  
24 complements earlier findings about introgressed variants from archaics,  
25 and highlights the role of genes that deserve closer experimental atten-  
26 tion.

27 **1 Introduction**

28 State-of-the-art geometric morphometric analysis on endocasts [1, 2, 3, 4, 5]  
29 have revealed significant differences between Neanderthal and *Homo sapiens*  
30 skulls that are most likely the result of differential growth of neural tissue.  
31 Specific regions of the cerebellum, parietal and temporal lobes appear to have  
32 expanded in the modern lineage. These changes may have had consequences  
33 for the evolution of modern human cognition. In addition, facial differences

34 between modern and archaic humans have been claimed to go hand in hand  
35 with a reduction of certain brain and neural crest-derived structures such as the  
36 Hypothalamus-Pituitary-Adrenal Gland axis [6, 7].

37 Probing the nature of these differences directly, by looking at differences in  
38 brain tissue, is challenging, but the availability of several high-quality archaic  
39 genomes [8, 9, 10] has opened numerous research avenues and opportunities  
40 for studying the evolution of the *Homo sapiens* brain with unprecedented pre-  
41 cision. Apart from the possibility of introducing specific archaic variants in  
42 model organisms both *in vivo* (transgenic mouse models) and *in vitro* (brain  
43 organoids) [11], researchers have explored the idea of connecting variation in  
44 modern human genomes data and brain evolution. A major study [12] explored  
45 the effects of Neanderthal and Denisovan introgressed variants in 44 tissues and  
46 found downregulation by introgressed alleles in the brain, particularly in the  
47 cerebellum and the striatum. In a similar vein, another study [13] examined the  
48 effects of archaic introgression on brain and skull shape variability in a modern  
49 human population to determine which variants are associated with the globu-  
50 larized brain/skull that is characteristic of anatomically modern humans. Here  
51 too, the variants with the most salient effects were those found to affect the  
52 structure of the cerebellum and the striatum.

53 Building on these efforts, we chose to focus on the effects of derived, modern-  
54 specific alleles, as opposed to introgressed archaic alleles. To this end, we took  
55 advantage of a recent systematic review of high frequency changes in modern  
56 humans [14], which provides an exhaustive database of derived, *Homo sapi-*  
57 *ens*-specific alleles found at very high frequencies in modern human popula-  
58 tions ( $\geq 90\%$  fixation). Because they are nearly fixed, these alleles can be com-  
59 pared to ancestral variants found at very low frequencies in modern genomes.  
60 To determine the predicted effect on gene expression of these derived, modern  
61 human-specific alleles, we exploited the GTEx database (version 8), which offers  
62 data for the following tissues of interest: Adrenal Gland, Amygdala, Caudate,  
63 Brodmann Area (BA) 9, BA24, Cerebellum, Cerebellar Hemisphere, Cortex,  
64 Hippocampus, Hypothalamus, Nucleus Accumbens, Pituitary, Putamen, Spinal  
65 Cord, and Substantia Nigra. Of these samples, cerebellar hemisphere and the  
66 cerebellum, as well as cortex and BA9, are to be treated as duplicates [15].  
67 Though not a brain tissue *per se*, the adrenal gland was included due to its role  
68 in the Hypothalamic-pituitary-adrenal (HPA) axis, an important regulator of  
69 the neuroendocrine system that affects behavior.

70 We wish to stress that our focus on brain(-related) structures in no way  
71 is intended to claim that only the brain is the most salient locus of difference  
72 between moderns and archaics. While other body parts undoubtedly display  
73 derived characteristics, we have concentrated on the brain here because our  
74 primary interest lies in cognition and behavior, which is most directly affected  
75 by brain-related changes.

76 The GTEx data consist of statistically significant allele effects on gene ex-  
77 pression dosage in single tissues, obtained from tissues of adult individuals aged  
78 20 to 60 [15]. By offering information about Expression Quantitative Trait Loci  
79 (cis-eQTLs) across tissues, the GTEx database forces us to think beyond vari-

80 ants that affect the structure and function of proteins, as well as to consider  
81 those that regulate gene expression. Early efforts tried to determine the molecu-  
82 lar basis of archaic-modern differences based on the few missense mutations that  
83 are *Homo sapiens*-specific [16]. But evidence is rapidly emerging in favor of an  
84 important evolutionary role of regulatory variants, as originally proposed more  
85 than four decades ago [17]. For instance, selective sweep scans to detect areas of  
86 the genome that have been significantly affected by natural selection after the  
87 split with Neanderthals show that regulatory variants played a prominent role  
88 [18]. Likewise, changes in potential regulatory elements have been singled out  
89 in attempts to identify the factors that gave the modern human face its shape  
90 [6, 19]. Other approaches, exploiting biobank data [20], have also stressed dif-  
91 ferences in gene regulatory architecture between modern humans and archaic  
92 hominins. Our study contributes to this emerging literature and highlights novel  
93 regulatory changes that deserve further experimentation.

## 94 2 Results

95 Our primary data source was the dataset in [14] that determines *Homo sapiens*  
96 allele specificity using the three high-coverage archaic human genomes, includ-  
97 ing the Altai [8] and Vindija [9] Neanderthals, and a high-quality sequence of  
98 the genome of a Denisovan [10], as well as chimpanzee and macaque data to de-  
99 termine which allele was derived or ancestral. We adopted the filtering criteria  
100 ( $\geq 90\%$  allele frequency) established in the original study [14], but, departing  
101 from the original article data, we decided to restrict our attention to those de-  
102 rived alleles found at high frequency ( $\geq 90\%$  fixation) not only globally, but in  
103 each of the major human populations (see section 4). We then crossed the list  
104 of variants obtained with the GTEX v8 data to determine which of these alle-  
105 les significantly affected gene expression, focusing on the 15 tissues mentioned  
106 above. We further integrated our data with a curated collection of all published  
107 genome-wide association studies, produced by a collaboration between EMBL-  
108 EBI and NHGRI [21], the Clinvar database [22], as well as other genomic regions  
109 identified as being of interest for human evolution, such as regions showing sig-  
110 nals of putative positive selection [18, 23] or deserts of introgression (regions  
111 depleted of introgressed variants) [24].

### 112 2.1 eQTL numbers and distribution

113 The resulting dataset is composed of *Homo sapiens* derived alleles at high fre-  
114 quency that have a statistically significant effect on gene expression in any of  
115 the adult human tissues we selected. This includes 8,271 statistically significant  
116 unique SNPs associated with the regulation of a total of 896 eGenes (i.e., genes  
117 affected by cis-regulation) (Figure 1). The total number of eQTLs in the pro-  
118 cessed dataset correlates moderately with chromosome size ( $r = 66$ ;  $p = 0.00053$ ,  
119 Pearson correlation test). Chromosome Y is not included in the analysis due  
120 to the lack of Y chromosomes in the archaic samples. Among eQTLs, intron

121 variants are over-represented (Figure 2). We identified one stop loss in *PSPN*  
122 (persephin neurotrophic factor) (rs80336323), 16 splice region variants and 47  
123 missense variants (Figure 2), including one in *PCNT*, a gene that we return to  
124 in section 2.3. Transcription start site (TSS) distance approximates a normal  
125 distribution, as shown in Figure 2. We find some degree of functional overlap  
126 among eQTLs: 161 eQTLs regulate various genes in the same tissue or across  
127 different tissues. The tissue with the highest number of tissue-specific eQTLs  
128 is the pituitary, followed by the cerebellum and the adrenal gland (Figure 3).

129 Because eQTL mapping is highly dependent on the number of samples [25],  
130 we sought to determine if there was a tendency of tissues with more samples  
131 to have a higher number of significant variants (Figure 3). We found that  
132 there is indeed a linear correlation ( $p = 0.00057$ ;  $r = 0.78$ , Pearson correla-  
133 tion test) between sample size and number of significant variants. Nonetheless  
134 we discovered that the cerebellum stood out in containing a high number of  
135 expression-affecting variants relative to its sample size and to other tissues. A  
136 Principal Component Analysis of the data revealed that there is a correlation  
137 between minor allele frequency and minor allele samples in the GTEx database  
138 (Supplementary Figure S1). Given that brain samples are hard to obtain, this  
139 correlation signals that the rarer the allele the more likely a given eQTL locus  
140 is to be undersampled.

141 Concerning directionality of expression, regulated by identified variants,  
142 there is an overall tendency for ancestral alleles to downregulate gene expression  
143 (Figure 3). This tendency is particularly prominent in the Substantia Nigra. We  
144 performed a binomial exact test to determine if this deviation was significant,  
145 and found this to be the case ( $p < 0.05$ ) in all tissues except for ‘Cortex’, ‘Hy-  
146 pothalamus’ and ‘Nucleus Accumbens’. A previous study looking at the effect of  
147 introgressed variants on gene expression [12] had suggested that (introgressed)  
148 Neanderthal alleles downregulate gene expression in the brain and testes. As  
149 far as the brain is concerned, this observation (generalized to archaic variants)  
150 also obtains in our study, with the added result that there seems to be brain-  
151 tissue-dependent variability in the degree of downregulation when the derived  
152 eQTL is found in high frequency.

153 In order to control for linkage disequilibrium, we clumped the variants from  
154 our database around the allele with the lowest p-value in eQTL mapping. This  
155 reduced the total number of variants in our data to 4,128, out of which 1,336  
156 are tissue-specific. Among the eGenes with the strongest effects across tissues  
157 (top 5%), one finds *METTL14*, present in cerebellar, cortex and pituitary sam-  
158 ples. *METTL14*, along with *METTL3*, is part of a complex that regulates ex-  
159 pression of N6-methyladenosine (m6a), an epitranslational RNA modifier that  
160 has been shown to have an important role in cerebellar development in mice  
161 [26]. *METTL14* also plays a role in oligodendrocyte maturation and myeli-  
162 nation [27], as well as in extending neurogenesis to postnatal developmental  
163 stages [28]. Among the eGenes that emerged after clumping we also find other  
164 genes related to neurodevelopment, such as *NUDC*, necessary for neuronal mi-  
165 gration [29], and *PIGV*, associated with Hyperphosphatasia-mental retardation  
166 syndrome [30].

| Tissue                            | Molecular process                                                      | Transcription factor |
|-----------------------------------|------------------------------------------------------------------------|----------------------|
| Caudate                           | Cytosol                                                                | -                    |
| Cerebellar hemisphere, Cerebellum | -                                                                      | E2F-4                |
| BA9                               | -                                                                      | N-Myc                |
| Hippocampus                       | TCA Cycle and Deficiency of Pyruvate Dehydrogen                        | -                    |
| Putamen                           | Melanin biosynthesis                                                   | -                    |
| Substantia Nigra                  | Cell-cell adhesion, integral component of plasma membrane, ion binding | HOXB8                |

Table 1: A summary of Gene Ontology analysis results per tissue after variant clumping.

| rsID       | Gene          | Clinical condition                |
|------------|---------------|-----------------------------------|
| rs17643644 | <i>SF3B4</i>  | Nager Syndrome                    |
| rs17801742 | <i>COL2A1</i> | Stickler Syndrome                 |
| rs34500739 | <i>PCNT</i>   | Microcephalic primordial dwarfism |
| rs79305633 | <i>RYR3</i>   | Epileptic encephalopathy          |

Table 2: Benign variants in our database that were associated in Clinvar with craniofacial and bone atypical development. The full list can be found in Supplementary Table S2.

## 167 2.2 Enrichment analysis

168 Using the clumped subset of variants, we performed a GO enrichment analysis  
 169 for each of the 15 tissues' top variants (selected results discussed in Table 1). We  
 170 found an enrichment in transcription factors related to brain development. *E2F-*  
 171 *4* is enriched in both cerebellar tissues included in this study. *E2F-4* knockout  
 172 mice show developmental delay of the cerebellum, as well as abnormal craniofa-  
 173 cial development, through dysregulation of the Sonic Hedgehog (Shh) pathway  
 174 [31]. *N-Myc*, enriched in Brodmann Area 9, is necessary for typical neuronal  
 175 development [32]. In the Substantia Nigra we report an enrichment for the  
 176 *HOXB8* transcription factor, which has been related to OCD-like behavior in  
 177 mice through alterations in corticostriatal circuitry [33].

178 At the cell level we found enrichments for neuromelanin biosynthesis, argued  
 179 to be related to neuroprotection and aging diseases [34] as well as ion binding,  
 180 a key physiological function disrupted in Parkinson's Disease in the Substantia  
 181 Nigra [35]. Other results, such as an enrichment in Pyruvate Dehydrogen de-  
 182 ficiency in the hippocampus, also point to neurodegeneration as an important  
 183 factor, as Pyruvate is known to protect against Alzheimer's disease [36] and the  
 184 Hippocampus is one of the main tissues affected by the disease [37].

## 185 2.3 Clinical data and GWAS

186 Out of the clumped data, a total number of 11 variants were assigned a benign  
 187 association with clinical conditions in Clinvar [22]. While this means there was  
 188 no Mendelian association between these variants and the appearance of these  
 189 conditions, they do affect the expression of the genes associated with the clinical  
 190 phenotype, even if not to the point of causing atypical development. We find  
 191 that several of these associations are related to collagen development: reduced  
 192 levels of *SF3B4*, a regulator of transcription, have been associated with collagen

193 secretion problems [38]; *COL2A1* and *PCNT* are known to affect craniofacial  
194 development [39, 40]; *RYR3* is part of the family of ryanodine receptors that  
195 regulate calcium metabolism in bone [41]. In the NHGRI-EMBI GWAS catalog  
196 [21] we found that a variant of *COL2A1* was also the top result of a GWAS  
197 height study [42]. Interestingly, a variant that lies in *BAZ1B*, a gene related to  
198 craniofacial development in human evolution and part of the Williams-Beuren  
199 Syndrome critical region [6], was found to be one of the top results of a GWAS  
200 that measured infant head circumference [43]. This variant affected gene ex-  
201 pression in cerebellar tissue in our data. We also found four variants associated  
202 to cognitive phenotypes: myelination [44], loneliness [45] and autism [46] (see  
203 Supplementary Table S1 for the full results).

## 204 2.4 Regions of evolutionary significance

205 To further determine the evolutionary significance of any of the genes that are  
206 affected by regulation in our data, we tested whether whether the eQTLs, or  
207 genes regulated by them, fell within positively selected regions of the genome  
208 in modern humans versus archaics ([18, 23]). We ran two randomization and  
209 permutation tests ( $N = 10,000$ ) with [47] to see if the SNPs accumulate signif-  
210 icantly in regions under positive selection relative to archaic humans (Supple-  
211 mentary Figure S2).

212 We found a significant ( $p < 0.0013$ ) overlap between eQTLs and regions of  
213 positive selection as defined by [18]. There was also significant overlap with an  
214 earlier independent study identifying regions under positive selection ( $p < 0.015$ )  
215 [23]. The permutation tests were done using the unclumped data (see section  
216 4). A chi-square independence test showed that Adrenal Gland, Brodmann Area  
217 24, Amygdala and Pituitary have a significantly larger amount of eQTLs under  
218 positive selection relative to the other tissues ( $p < 0.05$  after Bonferroni correc-  
219 tion). Other tissues such as the cerebellum also showed a significant deviation  
220 from the overall proportion, but only for one of the studies [18].

221 Some of the genes associated with signals of positive selection and affected  
222 by differential gene expression have already been linked to clinical phenotypes  
223 or brain development: for example, *NRG4* is involved in dendritic develop-  
224 ment [48]. *RAB7A* has been found to be related to tau secretion, a marker  
225 of Alzheimer’s disease [49], and *GABPB2* has been associated with schizophre-  
226 nia [50]. The *BAZ1B* variant discussed in section 2.3 affects the expression of  
227 two genes that, like *BAZ1B* itself, are part of the Williams-Beuren Syndrome  
228 Critical Region (*MLXIPL* and *NSUN5P2*).

229 Additionally, we tested whether any of the eQTLs fell within deserts of  
230 introgression, i.e., genetic windows of at least 10 Mb that have resisted genetic  
231 flow from Neanderthals and Denisovans to *Homo sapiens* ([24]). While some  
232 eQTLs do fall within these regions, a permutation test showed that they are not  
233 significantly enriched for such variants ( $p > 0.18$ ). We also explored whether  
234 derived eQTLs overlapped with any known human miRNA or miRNA seeds (as  
235 defined in [51]), but found no overlap with our data.

### 236 3 Discussion

237 In this study we sought to shed light on which brain regions may be evolutionar-  
238 ily more derived in modern humans compared to their closest extinct relatives by  
239 quantifying the extent of differential gene regulation caused by modern-human-  
240 specific (derived) alleles found at very high frequency. In so doing we hoped  
241 to complement previous work [12, 13] focusing on the effects of introgressed  
242 (archaic) variants.

243 Three regions stand out in our data: the cerebellum, pituitary, and adrenal  
244 gland, which exhibit the highest degrees of eQTL tissue-specificity (Figure 3).  
245 While it has been pointed out that the cerebellum has a particular methylation  
246 profile compared to the rest of the brain, possibly affecting eQTL detection  
247 [52, 53], this argument does not hold for the pituitary and adrenal gland. For  
248 these, tissue specificity may be due to them belonging to the neuroendocrine  
249 pathway. The cerebellum also stands out in our study in terms of the number  
250 of variants that it contains relative to its sample size, as evidenced in Figure 3.  
251 The distinctive character of the cerebellum, the pituitary and the adrenal gland  
252 could be taken as support for claims assigning a special status to the cerebellum  
253 and the HPA axis in the context of modern human evolution [3, 6, 7, 13].

254 We replicated the observation [12] that archaic variants tend to cause gene  
255 downregulation in the modern human brain. We note that in our study, this  
256 effect is brain tissue dependent (it does not obtain for Cortex, Hypothalamus,  
257 and Nucleus Accumbens). Moreover, our results may be affected in part by  
258 tissue sample size, as the tissue with the highest proportion of downregulation,  
259 the Substantia Nigra, is the tissue with the lowest number of samples (figure  
260 3). Our study also supports the claim [18] that regulatory regions tend to be  
261 associated with signals of positive selection in modern humans, as we found that  
262 high-frequency variants detected as cis-eQTLs are significantly present in areas  
263 identified as positively selected in two independent studies. Cross-checking these  
264 variants with comprehensive GWAS and medical databases suggests that these  
265 may have had consequences for cognition.

266 In terms of candidate genes and processes, we wish to highlight the enrich-  
267 ment we found associated with the *E2F4* transcription factor in cerebellar tissue.  
268 *E2F4* is an important postmitotic neuroblast regulator in mice [48]. If this is  
269 also confirmed to be the case for humans, neuroblasts might have been affected  
270 by differential regulation in *Homo sapiens*. In terms of brain disorders, we also  
271 found enrichments for genes related to neurodegenerative diseases (section 2.2).  
272 It has been pointed out that the origin of these human-specific neurodegenera-  
273 tive diseases might be found in relatively recent evolutionary events [54, 55, 56].  
274 It might be the case that some of these variants found at high frequency con-  
275 tribute to the genetic makeup underlying our susceptibility to neurodegenera-  
276 tion.

277 The genetic regulatory networks shared by both the brain and craniofacial  
278 complex are also reflected in the amount of *Homo sapiens* derived eQTLs in  
279 the brain linked to disorders that affect skull morphology (see section 2.3). In  
280 this context we want to highlight the relevance of *BAZ1B*, a gene that we have

281 previously shown to affect the characteristic *Homo sapiens* facial shape but  
282 whose implication in brain evolution is still poorly understood.

283 All in all, our work reinforces the potential of using human variation databases  
284 as a valuable point of entry to connect genotype and phenotype in brain evo-  
285 lution studies, and corroborates claims made on the basis of the (fragmented)  
286 fossil record concerning the mosaic nature of our brain’s evolutionary trajectory.

## 287 4 Methods

288 We accessed the *Homo sapiens* variant annotation data from [14]. The origi-  
289 nal complete dataset is publicly available at [https://doi.org/10.6084/m9.](https://doi.org/10.6084/m9.figshare.8184038)  
290 [figshare.8184038](https://doi.org/10.6084/m9.figshare.8184038). This dataset includes archaic-specific variants and all loci  
291 showing variation within modern populations. It also contains information on  
292 population frequency, rsIDs and allele ancestry. For replication purposes,  
293 we wrote a script that reproduces the 90% frequency cutoff point in the original  
294 study. We filtered the variants according to the guidelines in [14] such that:  
295 1) all variants show 90% allele frequency, 2) the major allele present in *Homo*  
296 *sapiens* is derived (ancestrality is either determined by the criteria in [57] or  
297 by the macaque reference allele), whereas either archaic reliable genotypes have  
298 the ancestral allele, or the Denisovan carries the ancestral allele and one of the  
299 Neanderthals the derived allele (accounting for gene flow from *Homo sapiens* to  
300 Neanderthal).

301 Additionally, the original study we relied on [14] applies the 90% frequency  
302 cutoff point in a global manner: it requires that the global frequency of an al-  
303 lele be more than or equal to 90%, allowing for specific populations to display  
304 lower frequencies. Using the metapopulation frequency information provided  
305 in the original study, we applied a more rigorous filter and removed any alle-  
306 les that were below 90% in any of the five major metapopulations included  
307 (African, American, East Asian, European, South Asian). We then harmonized  
308 and mapped the high-frequency variants to the data provided by the GTEx  
309 database [25]. In order to do so we pruned out the alleles that did not have an  
310 assigned rsID.

311 Clumping of the variants to control for Linkage Disequilibrium was done  
312 with Plink (version 1.9), requiring a linkage disequilibrium score of 0.99 (i.e.,  
313 co-inheritance in 99% of cases) for an SNP to be clumped. The p-value for the  
314 eQTL mapping was used as the criterion to define a top variant, in such a way  
315 that haplotypes were clumped around the most robust eQTL candidate vari-  
316 ant. The linkage disequilibrium map was extracted from the 1000 Genomes  
317 project ftp server ([ftp://ftp.1000genomes.ebi.ac.uk/vol1/ftp/release/](ftp://ftp.1000genomes.ebi.ac.uk/vol1/ftp/release/20130502/)  
318 [20130502/](ftp://ftp.1000genomes.ebi.ac.uk/vol1/ftp/release/20130502/)) and is composed of a diverse panel of individuals from the five  
319 meta-populations mentioned above.

320 We performed the Gene Ontology analysis with the *gprofiler* R package [58].  
321 We performed the permutation test (n=10,000) with the R package RegioneR  
322 [47] using the unclumped data, as variants might clump around an eQTL falling  
323 outside windows of putative positive selection, causing an underrepresentation



324 of the number of data points inside such genomic areas. Figures were created  
325 with the ggplot2 R package [59], Circos [60] and RegioneR [47]. The miRNA  
326 data was extracted from the Supplementary Tables S6 and S7 of [51]. For the  
327 human selective sweep data we used Supplementary Table S5 from [23], and  
328 Supplementary Table S2 from [18]. For the deserts of introgression data we  
329 extracted the information from [24]: these tables, reformatted for the code of  
330 this article to be run, can be found in Supplementary Table S3. S3A, S3B and  
331 S3C correspond to

332 The complete code to reproduce the data processing, plot generation and  
333 analysis can be found in <https://github.com/AGMAndirko/GTEX-code>.

## 334 Acknowledgments

335 The Genotype-Tissue Expression (GTEx) Project was supported by the Com-  
336 mon Fund of the Office of the Director of the National Institutes of Health, and  
337 by NCI, NHGRI, NHLBI, NIDA, NIMH, and NINDS. The data used for the  
338 analyses described in this manuscript were obtained from the GTEx Portal on  
339 05/15/19.

## 340 Author Contributions

341 Conceptualization: CB & AA; Data Curation: AA; Formal Analysis: AA; Fund-  
342 ing Acquisition: CB; Investigation: CB & AA; Methodology: CB & AA; Soft-  
343 ware: AA; Supervision: CB; Visualization: CB & AA; Writing — Original Draft  
344 Preparation: CB & AA; Writing — Review & Editing: CB & AA.

## 345 Funding statement

346 AA acknowledges financial support from the Spanish Ministry of Economy  
347 and Competitiveness and the European Social Fund (BES-2017-080366). CB  
348 acknowledges financial support from the Spanish Ministry of Economy and  
349 Competitiveness/FEDER (grant FFI2016-78034-C2-1-P), the Marie Curie In-  
350 ternational Reintegration Grant from the European Union (PIRG-GA-2009-  
351 256413), research funds from the Fundació Bosch i Gimpera, the MEXT/JSPS  
352 Grant-in-Aid for Scientific Research on Innovative Areas 4903 (Evolinguistics:  
353 JP17H06379), and support from the Generalitat de Catalunya (2017-SGR-341).

## 354 Competing interest

355 Authors declare no competing financial or non-financial interest.

## 356 References

- 357 [1] P. Gunz, *et al.*, “Brain development after birth differs between Neanderthals  
358 and modern humans,” *Current Biology*, vol. 20, pp. R921–R922, Nov. 2010.
- 359 [2] J.-J. Hublin, *et al.*, “Brain ontogeny and life history in Pleistocene ho-  
360 minins,” *Phil. Trans. R. Soc. B*, vol. 370, p. 20140062, Mar. 2015.
- 361 [3] S. Neubauer, *et al.*, “The evolution of modern human brain shape,” *Sci.*  
362 *Adv.*, vol. 4, p. eaao5961, Jan. 2018.
- 363 [4] A. S. Pereira-Pedro, *et al.*, “A morphometric comparison of the parietal  
364 lobe in modern humans and Neanderthals,” *Journal of Human Evolution*,  
365 vol. 142, p. 102770, May 2020.
- 366 [5] T. Kochiyama, *et al.*, “Reconstructing the Neanderthal brain using com-  
367 putational anatomy,” *Scientific Reports*, vol. 8, p. 6296, Apr. 2018.

- 368 [6] M. Zanella, *et al.*, “Dosage analysis of the 7q11.23 Williams region identifies  
369 *BAZ1B* as a major human gene patterning the modern human face and  
370 underlying self-domestication,” *Sci. Adv.*, vol. 5, p. eaaw7908, Dec. 2019.
- 371 [7] R. W. Wrangham, *The Goodness Paradox: The Strange Relationship be-*  
372 *tween Virtue and Violence in Human Evolution*. New York: Pantheon  
373 Books, first edition ed., 2019.
- 374 [8] K. Prüfer, *et al.*, “The complete genome sequence of a Neanderthal from  
375 the Altai Mountains,” *Nature*, vol. 505, pp. 43–49, Jan. 2014.
- 376 [9] K. Prüfer, *et al.*, “A high-coverage Neanderthal genome from Vindija Cave  
377 in Croatia,” *Science*, vol. 358, pp. 655–658, Nov. 2017.
- 378 [10] M. Meyer, *et al.*, “A High-Coverage Genome Sequence from an Archaic  
379 Denisovan Individual,” *Science*, vol. 338, pp. 222–226, Oct. 2012.
- 380 [11] M. Dannemann, *et al.*, “Human stem cell resources are an inroad to Nean-  
381 dertal DNA functions,” preprint, *Evolutionary Biology*, Apr. 2018.
- 382 [12] R. C. McCoy, *et al.*, “Impacts of Neanderthal-Introgressed Sequences on  
383 the Landscape of Human Gene Expression,” *Cell*, vol. 168, pp. 916–927.e12,  
384 Feb. 2017.
- 385 [13] P. Gunz, *et al.*, “Neanderthal Introgression Sheds Light on Modern Human  
386 Endocranial Globularity,” *Current Biology*, vol. 29, pp. 120–127.e5, Jan.  
387 2019.
- 388 [14] M. Kuhlwilm *et al.*, “A catalog of single nucleotide changes distinguishing  
389 modern humans from archaic hominins,” *Sci Rep*, vol. 9, p. 8463, Dec. 2019.
- 390 [15] GTEx Consortium, “Genetic effects on gene expression across human tis-  
391 sues,” *Nature*, vol. 550, pp. 204–213, Oct. 2017.
- 392 [16] S. Pääbo, “The Human Condition—A Molecular Approach,” *Cell*, vol. 157,  
393 pp. 216–226, Mar. 2014.
- 394 [17] M. King *et al.*, “Evolution at two levels in humans and chimpanzees,”  
395 *Science*, vol. 188, pp. 107–116, Apr. 1975.
- 396 [18] S. Peyrégne, *et al.*, “Detecting ancient positive selection in humans using  
397 extended lineage sorting,” *Genome Res.*, vol. 27, pp. 1563–1572, Sept. 2017.
- 398 [19] D. Gokhman, *et al.*, “Differential DNA methylation of vocal and facial  
399 anatomy genes in modern humans,” *Nat Commun*, vol. 11, p. 1189, Dec.  
400 2020.
- 401 [20] L. L. Colbran, *et al.*, “Inferred divergent gene regulation in archaic hominins  
402 reveals potential phenotypic differences,” *Nat Ecol Evol*, vol. 3, pp. 1598–  
403 1606, Nov. 2019.

- 404 [21] A. Buniello, *et al.*, “The NHGRI-EBI GWAS Catalog of published genome-  
405 wide association studies, targeted arrays and summary statistics 2019,”  
406 *Nucleic Acids Research*, vol. 47, pp. D1005–D1012, Jan. 2019.
- 407 [22] M. J. Landrum, *et al.*, “ClinVar: Improving access to variant interpretations  
408 and supporting evidence,” *Nucleic Acids Research*, vol. 46, pp. D1062–  
409 D1067, Jan. 2018.
- 410 [23] F. Racimo, *et al.*, “A Test for Ancient Selective Sweeps and an Application  
411 to Candidate Sites in Modern Humans,” *Molecular Biology and Evolution*,  
412 vol. 31, pp. 3344–3358, Dec. 2014.
- 413 [24] S. Sankararaman, *et al.*, “The Combined Landscape of Denisovan and Ne-  
414 anderthal Ancestry in Present-Day Humans,” *Current Biology*, vol. 26,  
415 pp. 1241–1247, May 2016.
- 416 [25] The GTEx Consortium, *et al.*, “The Genotype-Tissue Expression (GTEx)  
417 pilot analysis: Multitissue gene regulation in humans,” *Science*, vol. 348,  
418 pp. 648–660, May 2015.
- 419 [26] C. Ma, *et al.*, “RNA m6A methylation participates in regulation of post-  
420 natal development of the mouse cerebellum,” *Genome Biol*, vol. 19, p. 68,  
421 Dec. 2018.
- 422 [27] H. Xu, *et al.*, “m6A mRNA Methylation Is Essential for Oligodendrocyte  
423 Maturation and CNS Myelination,” *Neuron*, vol. 105, pp. 293–309.e5, Jan.  
424 2020.
- 425 [28] K.-J. Yoon, *et al.*, “Temporal Control of Mammalian Cortical Neurogenesis  
426 by m6A Methylation,” *Cell*, vol. 171, pp. 877–889.e17, Nov. 2017.
- 427 [29] S. Cappello, *et al.*, “NudC is required for interkinetic nuclear migration  
428 and neuronal migration during neocortical development,” *Developmental*  
429 *Biology*, vol. 357, pp. 326–335, Sept. 2011.
- 430 [30] D. Horn, *et al.*, “Delineation of PIGV mutation spectrum and associated  
431 phenotypes in hyperphosphatasia with mental retardation syndrome,” *Eur*  
432 *J Hum Genet*, vol. 22, pp. 762–767, June 2014.
- 433 [31] V. A. Swiss *et al.*, “Cell-context specific role of the E2F/Rb pathway in  
434 development and disease,” *Glia*, pp. NA–NA, 2009.
- 435 [32] P. S. Knoepfler, “N-myc is essential during neurogenesis for the rapid ex-  
436 pansion of progenitor cell populations and the inhibition of neuronal dif-  
437 ferentiation,” *Genes & Development*, vol. 16, pp. 2699–2712, Oct. 2002.
- 438 [33] J. M. Greer *et al.*, “Hoxb8 Is Required for Normal Grooming Behavior in  
439 Mice,” *Neuron*, vol. 33, pp. 23–34, Jan. 2002.

- 440 [34] L. Zecca, *et al.*, “New melanic pigments in the human brain that accumulate  
441 in aging and block environmental toxic metals,” *Proceedings of the National*  
442 *Academy of Sciences*, vol. 105, pp. 17567–17572, Nov. 2008.
- 443 [35] N. González, *et al.*, “Effects of alpha-synuclein post-translational modi-  
444 fications on metal binding,” *J. Neurochem.*, vol. 150, pp. 507–521, Sept.  
445 2019.
- 446 [36] X. Wang, *et al.*, “Systemic pyruvate administration markedly reduces neu-  
447 ronal death and cognitive impairment in a rat model of Alzheimer’s dis-  
448 ease,” *Experimental Neurology*, vol. 271, pp. 145–154, Sept. 2015.
- 449 [37] K. Moodley *et al.*, “The Hippocampus in Neurodegenerative Disease,” in  
450 *Frontiers of Neurology and Neuroscience* (K. Szabo *et al.*, eds.), vol. 34,  
451 pp. 95–108, Basel: S. KARGER AG, 2014.
- 452 [38] F. Xiong *et al.*, “SF3b4: A Versatile Player in Eukaryotic Cells,” *Front.*  
453 *Cell Dev. Biol.*, vol. 8, p. 14, Jan. 2020.
- 454 [39] A. Rauch, *et al.*, “Mutations in the Pericentrin (PCNT) Gene Cause Pri-  
455 mordial Dwarfism,” *Science*, vol. 319, pp. 816–819, Feb. 2008.
- 456 [40] L. Guo, *et al.*, “Novel and recurrent COL11A1 and COL2A1 mutations  
457 in the Marshall–Stickler syndrome spectrum,” *Hum Genome Var*, vol. 4,  
458 p. 17040, Dec. 2017.
- 459 [41] L. J. Robinson, *et al.*, “Regulation of bone turnover by calcium-regulated  
460 calcium channels: Regulation of bone turnover,” *Annals of the New York*  
461 *Academy of Sciences*, vol. 1192, pp. 351–357, Apr. 2010.
- 462 [42] G. Kichaev, *et al.*, “Leveraging Polygenic Functional Enrichment to Im-  
463 prove GWAS Power,” *The American Journal of Human Genetics*, vol. 104,  
464 pp. 65–75, Jan. 2019.
- 465 [43] X.-L. Yang, *et al.*, “Three Novel Loci for Infant Head Circumference Identi-  
466 fied by a Joint Association Analysis,” *Front. Genet.*, vol. 10, p. 947, Oct.  
467 2019.
- 468 [44] W. D. Hill, *et al.*, “A combined analysis of genetically correlated traits iden-  
469 tifies 187 loci and a role for neurogenesis and myelination in intelligence,”  
470 *Mol Psychiatry*, vol. 24, pp. 169–181, Feb. 2019.
- 471 [45] J. Gao, *et al.*, “Genome-Wide Association Study of Loneliness Demon-  
472 strates a Role for Common Variation,” *Neuropsychopharmacol*, vol. 42,  
473 pp. 811–821, Mar. 2017.
- 474 [46] “Identification of risk loci with shared effects on five major psychiatric  
475 disorders: A genome-wide analysis,” *The Lancet*, vol. 381, pp. 1371–1379,  
476 Apr. 2013.

- 477 [47] B. Gel, *et al.*, “regioner: An R/Bioconductor package for the association  
478 analysis of genomic regions based on permutation tests,” *Bioinformatics*,  
479 p. btv562, Sept. 2015.
- 480 [48] B. Paramo, *et al.*, “An essential role for neuregulin-4 in the growth and  
481 elaboration of developing neocortical pyramidal dendrites,” *Experimental*  
482 *Neurology*, vol. 302, pp. 85–92, Apr. 2018.
- 483 [49] L. Rodriguez, *et al.*, “Rab7A regulates tau secretion,” *J. Neurochem.*,  
484 vol. 141, pp. 592–605, May 2017.
- 485 [50] S.-A. Lee *et al.*, “Epigenetic profiling of human brain differential DNA  
486 methylation networks in schizophrenia,” *BMC Med Genomics*, vol. 9, p. 68,  
487 Dec. 2016.
- 488 [51] P. R. Branco, *et al.*, “Uncovering association networks through an eQTL  
489 analysis involving human miRNAs and lincRNAs,” *Sci Rep*, vol. 8, p. 15050,  
490 Dec. 2018.
- 491 [52] S. K. Sieberts, *et al.*, “Large eQTL meta-analysis reveals differing patterns  
492 between cerebral cortical and cerebellar brain regions,” preprint, Genetics,  
493 May 2019.
- 494 [53] L. M. F. Sng, *et al.*, “Genome-wide human brain eQTLs: In-depth analysis  
495 and insights using the UKBEC dataset,” *Sci Rep*, vol. 9, p. 19201, Dec.  
496 2019.
- 497 [54] E. Bufill, *et al.*, “Alzheimer’s disease: An evolutionary approach,” *Journal*  
498 *of Anthropological Sciences*, no. 91, pp. 135–157, 2013.
- 499 [55] A. Nitsche, *et al.*, “Alzheimer-related genes show accelerated evolution,”  
500 *Mol Psychiatry*, Mar. 2020.
- 501 [56] E. Bruner *et al.*, “Alzheimer’s Disease: The Downside of a Highly Evolved  
502 Parietal Lobe?,” vol. 35, no. 2, pp. 227–240.
- 503 [57] B. Paten, *et al.*, “Genome-wide nucleotide-level mammalian ancestor re-  
504 construction,” *Genome Research*, vol. 18, pp. 1829–1843, Nov. 2008.
- 505 [58] U. Raudvere, *et al.*, “G:Profiler: A web server for functional enrichment  
506 analysis and conversions of gene lists (2019 update),” *Nucleic Acids Re-*  
507 *search*, vol. 47, pp. W191–W198, July 2019.
- 508 [59] H. Wickham, *Ggplot2: Elegant Graphics for Data Analysis*. Use R!, New  
509 York: Springer, 2009. OCLC: ocn382399721.
- 510 [60] M. Krzywinski, *et al.*, “Circos: An information aesthetic for comparative  
511 genomics,” *Genome Research*, vol. 19, pp. 1639–1645, Sept. 2009.

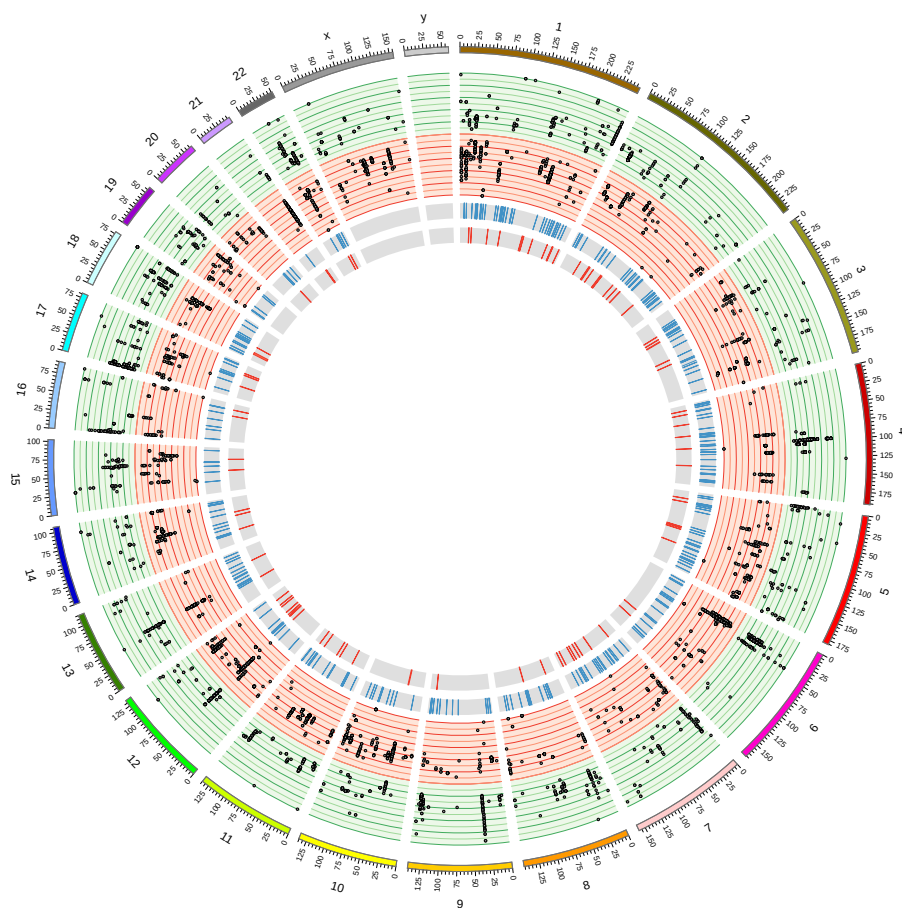

Figure 1: Circos plot showing the distribution along the genome of eQTLs. Each line denotes 0.5 steps in a gene expression normalized effect size, in a scale from 3 to -3. Red circles denote downregulation, green circles upregulation of eGenes. Inner rings: areas showing signals of positive selection relative to archaic humans in [18] (blue), and [23] (red).

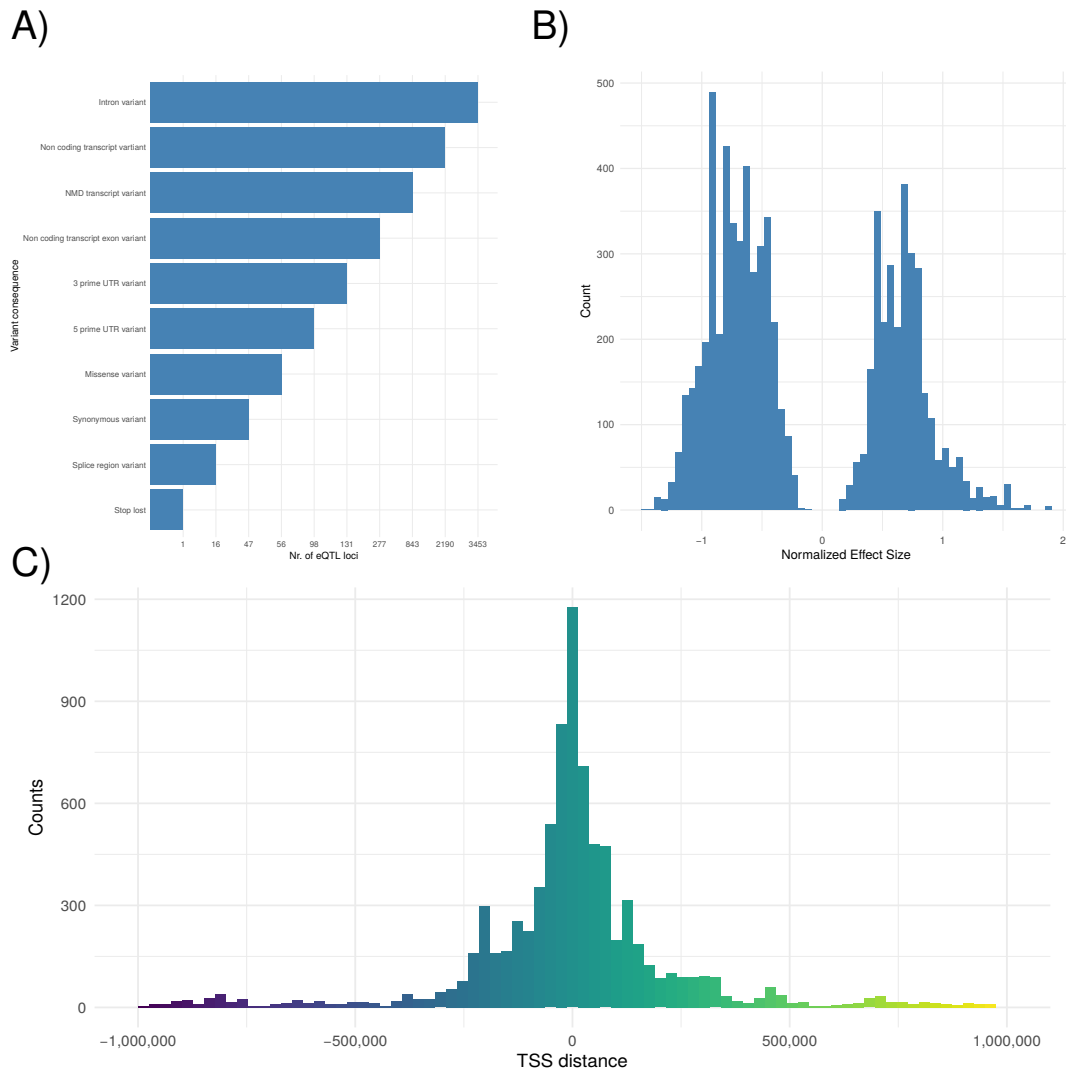

Figure 2: A) Barplot showing variant consequences of *Homo sapiens* cis-eQTL derived alleles, B) normalized effect size in gene expression across the 15 tissues, and C) distribution of eQTL distance to Transcription Starting Site (TSS). Figures A-C generated before clumping.



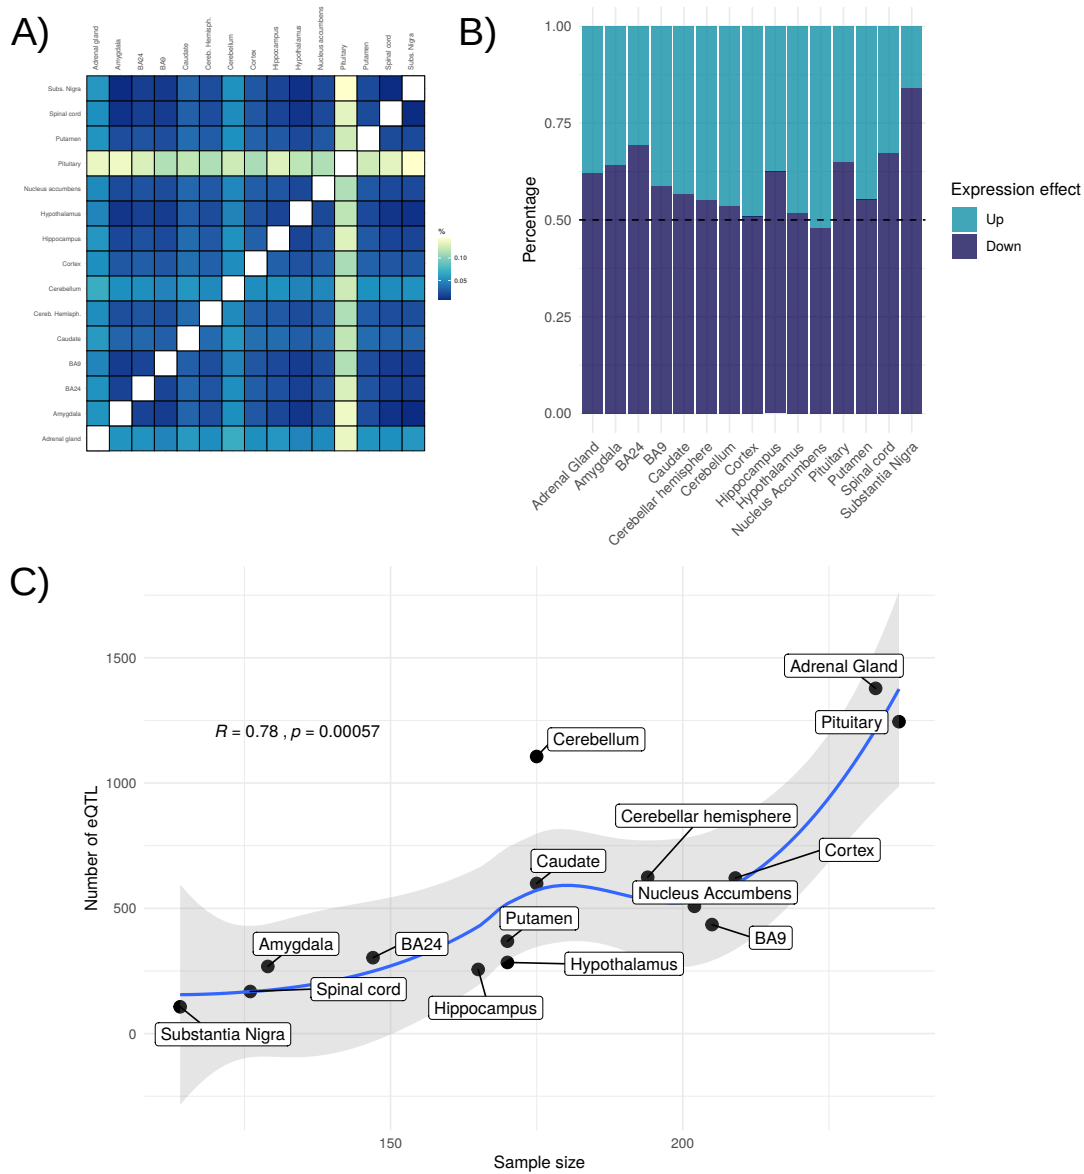

Figure 3: A) Heatmap showing the percentage of eQTL that are unique in each of the tissues B) ratio of normalized effect size in expression in each of the 15 tissues included in the study, and C) distribution of tissues in relation to sample size and unclumped database variants, after filtering for *Homo sapiens* specific frequency, and results ( $r$  and  $p$ -value) obtained by a Pearson correlation test.
